# Supplementary material for: Association of Adult Weight Gain With Major Health Outcomes Among Middle-aged Chinese Persons With Low Body Weight in Early Adulthood
Source: PubMed Central journal article supplement (PMC6991199; doi:10.1001/jamanetworkopen.2019.17371), 2019-12-13
Supplement: jamanetwopen-2-e1917371-s001.pdf [file jamanetwopen-2-e1917371-s001.pdf]

## Supplementary Online Content

Jia G, Shu X-O, Liu Y, et al. Association of adult weight gain with major health outcomes among middle-aged Chinese persons with low body weight in early adulthood. *JAMA Netw Open*. 2019;2(12):e1917371. doi:10.1001/jamanetworkopen.2019.17371

**eTable 1.** Selected Baseline Characteristics of Study Participants in the Shanghai Women's Health Study and Shanghai Men's Health Study (1996-2006)

**eFigure 1.** Dose-Response Association Between Weight Gain From Early to Middle Adulthood and Mortality for All-Cause and CVDs Among Subjects Who Had a BMI  $\geq 23$  at Middle Adulthood

**eTable 2.** Adjusted Hazard Ratios for Total and Cause-Specific Mortality Per 5 kg Weight Gain From Early to Middle Adulthood Stratified by Smoking Status, SMHS, 2002-2014

**eFigure 2.** Adjusted Cumulative Mortality for All-Cause and CVDs Among Men

This supplementary material has been provided by the authors to give readers additional information about their work.

**eTable 1.** Selected Baseline Characteristics of Study Participants in the Shanghai Women’s Health Study and Shanghai Men’s Health Study (1996-2006)

| Characteristics                                                    | Women               | Men               |
|--------------------------------------------------------------------|---------------------|-------------------|
|                                                                    | (n = 48,377)        | (n = 35,989)      |
| <b>Age, year, mean (SD)</b>                                        | 47.8 (5.3)          | 49.6 (5.1)        |
| <b>Height, cm, mean (SD)</b>                                       | 158.7 (5.2)         | 171.0 (5.6)       |
| <b>Body weight at age 20, kg, mean (SD)</b>                        | 49.7 (6.5)          | 57.1 (6.4)        |
| <b>BMI at baseline, mean (SD)</b>                                  | 23.8 (3.1)          | 23.9 (2.8)        |
| BMI ≥ 23, n (%)                                                    | 27,223 (56.3)       | 21,771 (60.5)     |
| <b>Weight gain, kg, mean (SD)</b>                                  | 10.3 (8.6)          | 12.8 (9.1)        |
| Weight loss > 2.5 kg, n (%)                                        | 3,277 (6.8)         | 1,465 (4.1)       |
| Weight loss ≤ 2.5 kg or weight gain < 2.5 kg, n (%)                | 4,999 (10.3)        | 2,9191 (8.1)      |
| Weight gain ≥ 2.5 kg and < 10.0 kg, n (%)                          | 14,587 (30.2)       | 8,894 (24.7)      |
| Weight gain ≥ 10.0kg and < 20.0 kg, n (%)                          | 19,198 (39.7)       | 15,102 (42.0)     |
| Weight gain ≥ 20.0kg, n (%)                                        | 6,316 (13.1)        | 7,609 (21.1)      |
| <b>Education, n (%)</b>                                            |                     |                   |
| Elementary or middle school                                        | 24,294 (50.2)       | 8,518 (37.6)      |
| High school graduate                                               | 16,559 (34.2)       | 12,954 (41.6)     |
| Some college or more                                               | 7,524 (15.6)        | 7,490 (20.8)      |
| <b>Total physical activities, MET-hr/wk per year, median (IQR)</b> | 99.23 (73.8, 131.3) | 53.8 (30.8, 70.7) |
| <b>Smoking status, n (%)</b>                                       |                     |                   |
| Never smoker                                                       | 48,377 (100)        | 8,518 (23.7)      |
| Ever smoker                                                        | 0                   | 27,471 (76.3)     |
| <b>Pack-years of smoking, mean (SD) <sup>a</sup></b>               |                     | 17.2 (15.4)       |
| <b>Healthy eating index, mean (SD) <sup>b</sup></b>                | 44.6 (7.8)          | 42.6 (8.3)        |
| <b>Family history of cancer, n (%)</b>                             | 13,417 (27.7)       | 10,495 (29.2)     |
| <b>Ever diagnosed at baseline, n (%) <sup>c</sup></b>              |                     |                   |
| Coronary heart disease                                             | 1,784 (3.7)         | 451 (1.3)         |
| Diabetes mellitus                                                  | 1,104 (2.3)         | 1,388 (3.9)       |
| Hypertension                                                       | 8,441 (17.4)        | 7,853 (21.8)      |
| Chronic Obstructive Pulmonary Disease                              | 2,857 (5.9)         | 747 (2.1)         |
| Chronic gastritis                                                  | 9,184 (19.0)        | 5,196 (14.4)      |
| <b>Postmenopausal, n (%)</b>                                       | 14,445 (29.9)       |                   |
| <b>Ever used female hormone replacement therapy, n (%)</b>         | 2,102 (4.3)         |                   |
| <b>Parity, n (%)</b>                                               |                     |                   |
| 1 Child                                                            | 35,521 (73.4)       |                   |
| ≥2 Children                                                        | 11,348 (23.5)       |                   |

Abbreviation: IQR, interquartile range; SD, standard deviation.

<sup>a</sup> Ever-smoking women were excluded from analyses.

<sup>b</sup> Alternative healthy eating index was developed from the dietary guidelines for Americans and modified by Harvard researchers. Details of the index have been described in previous publications <sup>20</sup>.

<sup>c</sup> Ever diagnosed with the disease prior to the baseline survey.

a). Total mortality of women

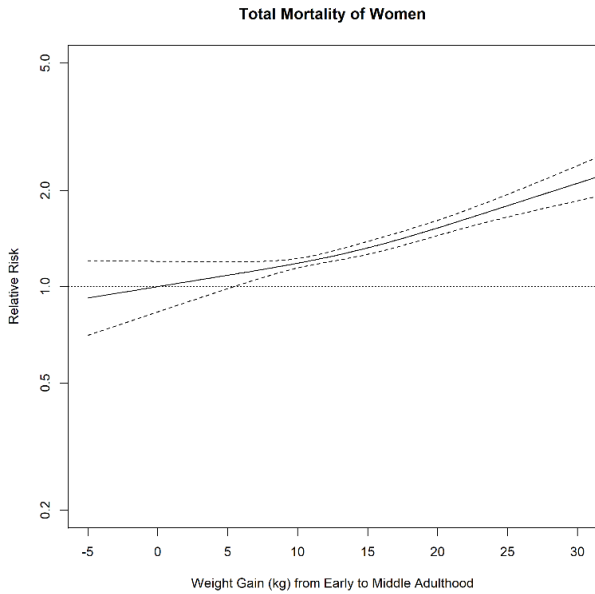

b). CVD mortality of women

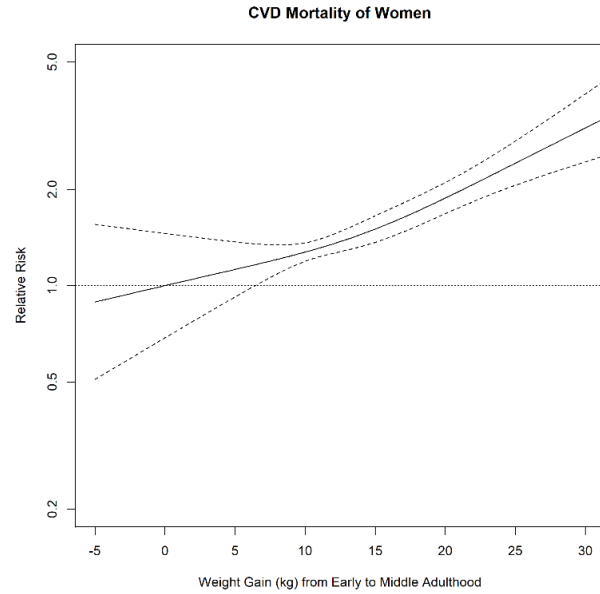

c). Total mortality of men

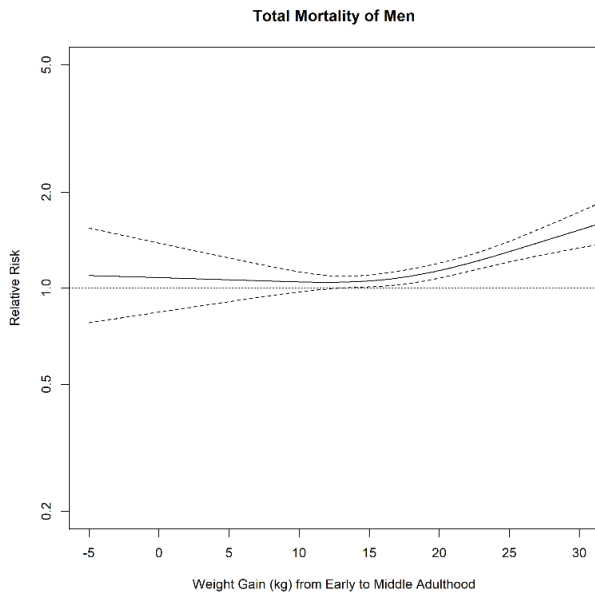

d). CVD mortality of men

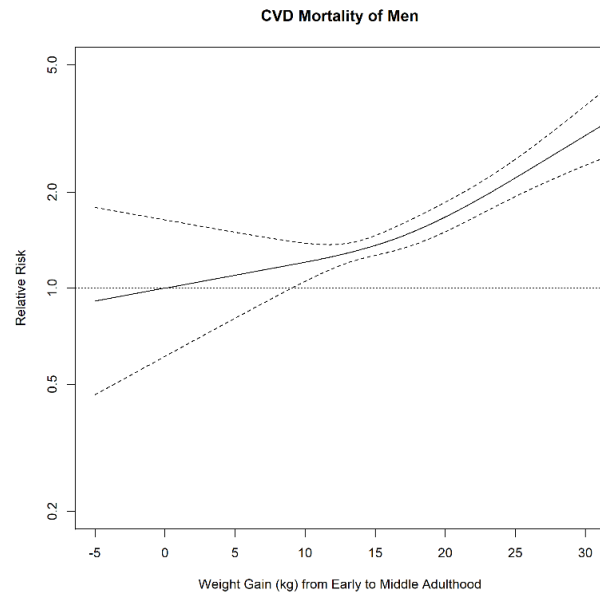

**eFigure 1. Dose-response association between weight gain from early to middle adulthood and mortality for all-cause and CVDs among subjects who had a BMI  $\geq 23$  at middle adulthood.** Spline regression was conducted with 3 knots and 0 kg weight change as reference; Female ever-smokers were excluded from analyses; Hazard ratios were adjusted for age at study enrollment, recalled weight at age 20, height, educational level, smoking status, pack-years of smoking, regular alcohol consumption, total physical activity, alternative healthy eating index (AHEI), family cancer history, menopausal status (women only), female hormone replacement therapy (women only), parity (women only), chronic diseases (type 2 diabetes, hypertension, COPD, coronary heart disease, and chronic gastritis) at baseline, and birth-cohorts.

**eTable 2.** Adjusted hazard ratios for total and cause-specific mortality per 5 kg weight gain from early to middle adulthood stratified by smoking status, SMHS, 2002-2014

| Mortality                 | Total         |                           |         | 18.5 < BMI < 23 |                           |         | BMI ≥ 23      |                           |         | P for interaction |
|---------------------------|---------------|---------------------------|---------|-----------------|---------------------------|---------|---------------|---------------------------|---------|-------------------|
|                           | No. of deaths | HRs (95% CI) <sup>a</sup> | P value | No. of deaths   | HRs (95% CI) <sup>a</sup> | P value | No. of deaths | HRs (95% CI) <sup>a</sup> | P value |                   |
| <b>Male never-smokers</b> | n = 8,518     |                           |         | n = 2,978       |                           |         | n = 5,540     |                           |         |                   |
| All-cause deaths          | 313           | 1.06 (0.98, 1.14)         | 0.135   | 94              | 0.82 (0.62, 1.10)         | 0.191   | 219           | 1.07 (0.95, 1.19)         | 0.268   | 0.737             |
| CVD deaths                | 73            | 1.23 (1.06, 1.43)         | 0.006   | 18              | 0.64 (0.34, 1.23)         | 0.184   | 55            | 1.29 (1.06, 1.57)         | 0.012   | 0.479             |
| Cancer deaths             | 163           | 1.01 (0.91, 1.12)         | 0.820   | 51              | 1.00 (0.67, 1.51)         | 0.991   | 112           | 0.96 (0.81, 1.13)         | 0.601   | 0.779             |
| Other deaths              | 77            | 1.00 (0.86, 1.16)         | 0.957   | 25              | 0.66 (0.38, 1.15)         | 0.143   | 52            | 1.05 (0.83, 1.33)         | 0.665   | 0.732             |
| <b>Male ever-smokers</b>  | n = 27,471    |                           |         | n = 11,240      |                           |         | n = 16,231    |                           |         |                   |
| All-cause deaths          | 1,331         | 0.99 (0.95, 1.02)         | 0.357   | 569             | 0.83 (0.74, 0.93)         | 0.001   | 762           | 1.10 (1.04, 1.16)         | 0.001   | 0.034             |
| CVD deaths                | 326           | 1.12 (1.05, 1.19)         | 0.001   | 124             | 0.99 (0.77, 1.26)         | 0.914   | 202           | 1.26 (1.15, 1.38)         | <0.001  | 0.056             |
| Cancer deaths             | 724           | 0.94 (0.90, 0.99)         | 0.009   | 325             | 0.78 (0.67, 0.91)         | 0.001   | 399           | 1.04 (0.96, 1.13)         | 0.307   | 0.518             |
| Other deaths              | 281           | 0.94 (0.88, 1.01)         | 0.107   | 120             | 0.82 (0.64, 1.06)         | 0.126   | 161           | 1.01 (0.89, 1.14)         | 0.896   | 0.272             |

Abbreviation: BMI, body mass index; CI, confidence interval; HR, hazard ratio.

<sup>a</sup> HRs were adjusted for age at study enrollment, recalled weight at age 20, height, educational level, smoking status (ever-smokers only), pack-years of smoking (ever-smokers only), regular alcohol consumption, total physical activity, healthy eating index, family cancer history, and birth-cohorts.

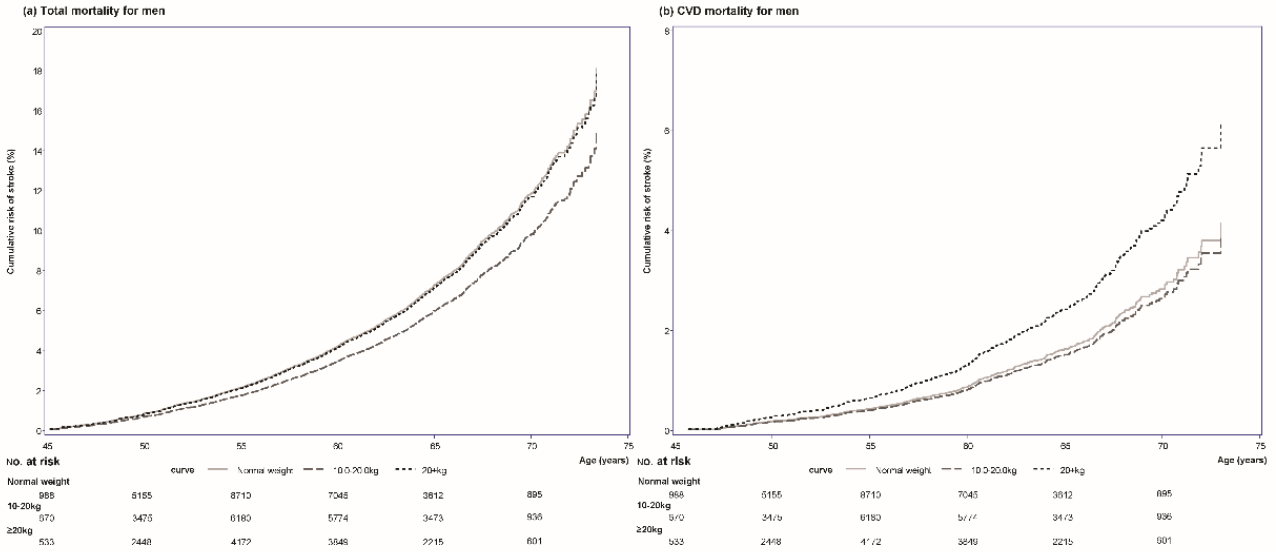

**eFigure 2. Adjusted cumulative mortality for all-cause and CVDs among men.** “Normal weight” group refers to participants who had a BMI in 18.5–22.9 at middle adulthood. “10–20kg” and “20+kg” groups refer to participants who gained 10–20 kg or more than 20 kg body weight from early to middle adulthood and reached a BMI  $\geq$  23 at middle adulthood, respectively. Rates were adjusted for age at study enrollment, recalled weight at age 20, height, educational level, regular alcohol consumption, total physical activity, healthy eating index, family cancer history, smoking status, pack-years of smoking, and birth-cohorts.
